# Supplementary material for: Mesothelin blockage by Amatuximab suppresses cell invasiveness, enhances gemcitabine sensitivity and regulates cancer cell stemness in mesothelin-positive pancreatic cancer cells
Source: Springer Nature journal article supplement (doi:10.1186/s12885-020-07722-3), 2021-02-26

## Supplemental figure 7

Analysis of mesothelin expression in the four human pancreatic cancer cells by immunocytochemistry

**a** AsPC-1

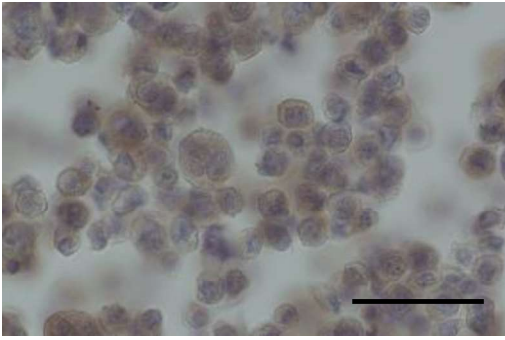

**b** Capan-2

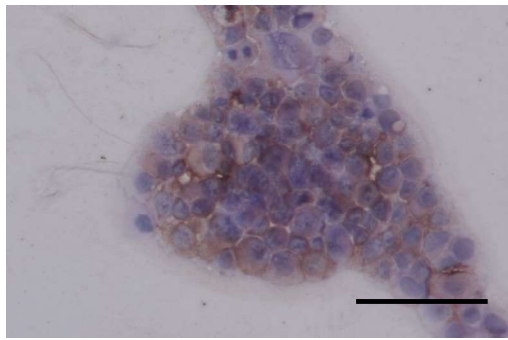

**c** Panc-1

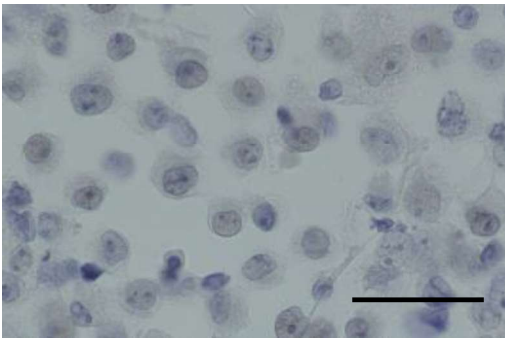

**d** MIA Paca-2

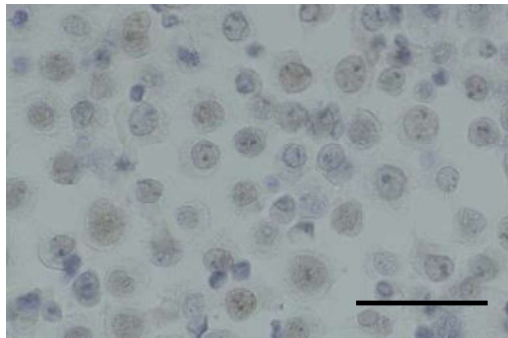

Supplement: MOESM9 [file 18908232]
